# Supplementary material for: One-step rapid colorimetric detection of K+ using silver nanoparticles modified by crown ether
Source: Royal Society of Chemistry journal article supplement (doi:10.1039/d2an01840c), 2022-12-19
Supplement: d2an01840c1.pdf [file d2an01840c1.pdf]

## Supplementary Information

*For*

### **One-step rapid colorimetric detection of K<sup>+</sup> using silver nanoparticles modified by crown ether**

Yufeng Sun <sup>a,b,c</sup>, Shengwen Wang <sup>b</sup>, Fangfang Wang <sup>b</sup>, Hao Zhang <sup>b</sup>, Weiya Huang <sup>\*a</sup>, Aiguo Wu <sup>b,c,d</sup>, Yujie Zhang <sup>\*b,c,d</sup>

<sup>a</sup> Faculty of Materials, Metallurgical and Chemistry, Jiangxi University of Science and Technology, Ganzhou 341000, China.

<sup>b</sup> Cixi Institute of Biomedical Engineering, International Cooperation Base of Biomedical Materials Technology and Application, CAS Key Laboratory of Magnetic Materials and Devices and Zhejiang Engineering Research Center for Biomedical Materials, Ningbo Institute of Materials Technology and Engineering, Chinese Academy of Sciences (CAS), Ningbo 315201, China

<sup>c</sup> Advanced Energy Science and Technology Guangdong Laboratory, Huizhou 516000, China

<sup>d</sup> University of Chinese Academy of Sciences, Beijing 100049, China

\* Corresponding Authors

Tel: +86(797) 8312334; Fax: +86(797) 8312334; Email: hweiya@126.com

Tel: 0086-574-86685513; Fax: 0086-574-86685163; Email: zhangyujie@nimt

e.ac.cn

## Table of Content

|                                                                                                                                              |     |
|----------------------------------------------------------------------------------------------------------------------------------------------|-----|
| <b>Table S1.</b> Cavity sizes of crown ethers estimated from atomic models and diameter of various cations.....                              | S3  |
| <b>Table. S2</b> O 1s XPS data of Ag NPs and ADC-Ag NPs .....                                                                                | S3  |
| <b>Table. S3</b> C 1s XPS data of Ag NPs and ADC-Ag NPs .....                                                                                | S3  |
| <b>Table. S4</b> Comparison of our developed sensor with other methods for K <sup>+</sup> determination .....                                | S3  |
| <b>Fig. S1</b> XPS spectra of Ag NPs under different conditions.....                                                                         | S5  |
| <b>Fig. S2</b> Effect of ADC content on the detection of K <sup>+</sup> .....                                                                | S6  |
| <b>Fig. S3</b> Effect of C <sub>6</sub> H <sub>5</sub> Na <sub>3</sub> O <sub>7</sub> concentration on the detection of K <sup>+</sup> ..... | S7  |
| <b>Fig. S4</b> Effect of HCl concentration on the detection effect of K <sup>+</sup> .....                                                   | S8  |
| <b>Fig. S5</b> Time dependent UV-vis absorption spectra of ADC-Ag NPs solution containing K <sup>+</sup> .....                               | S9  |
| <b>References</b> .....                                                                                                                      | S10 |

**Table S1.** Cavity sizes of crown ethers estimated from atomic models and diameter of various cations<sup>1</sup>

| Crown ethers | Cavity sizes (Å) | Cations                                               | Diameter of cations (Å) |
|--------------|------------------|-------------------------------------------------------|-------------------------|
| 12-crown-4   | 1.2-1.5          | Li <sup>+</sup> / Mg <sup>2+</sup> / Fe <sup>3+</sup> | 1.2 / 1.44 / 1.29       |
| 15-crown-5   | 1.7-2.2          | Na <sup>+</sup> / Ca <sup>2+</sup>                    | 2.04 / 2                |
| 18-crown-6   | 2.6-3.2          | K <sup>+</sup>                                        | 2.76                    |
| 21-crown-7   | 3.4-4.3          | Cs <sup>+</sup>                                       | 3.34                    |

**Table S2.** O 1s XPS data of Ag NPs and ADC-Ag NPs

|            | Attribution | Peak position/eV | Peak area | Content/% |
|------------|-------------|------------------|-----------|-----------|
| Ag NPs     | C-O         | 532.9            | 788.1     | 37.18     |
|            | C=O         | 531.1            | 1331.2    | 62.82     |
| ADC-Ag NPs | C-O         | 532.9            | 3415.1    | 57.07     |
|            | C=O         | 531.1            | 2568.0    | 42.93     |

**Table S3.** C 1s XPS data of Ag NPs and ADC-Ag NPs

|            | Attribution | Peak position/eV | Peak area | Content/% |
|------------|-------------|------------------|-----------|-----------|
| Ag NPs     | C-C/C-H     | 284.8            | 1192.0    | 66.67     |
|            | C-O         | 286.5            | 315.5     | 17.64     |
|            | C=O         | 288.4            | 280.6     | 15.69     |
| ADC-Ag NPs | C-C/C-H     | 284.8            | 2239.3    | 54.27     |
|            | C-O         | 286.5            | 1361.0    | 32.98     |
|            | C=O         | 288.4            | 526.1     | 12.75     |

**Table S4** Comparison of our developed sensor with other methods for K<sup>+</sup> determination

| Method                                  | Materials             | Preparation methods | Incubation         | LOD     | Reference |
|-----------------------------------------|-----------------------|---------------------|--------------------|---------|-----------|
| Raman scattering spectroscopy detection | Sodium cobaltinitrite | /                   | /                  | 10 μM   | 2         |
| Fluorescence detection                  | TBAC12-AgNCs          | /                   | /                  | 0.4 mM  | 3         |
| photoelectrochemical detection          | K-Pdots               | Sedimentation       | Periodic lighting  | 0.42 nM | 4         |
| Colorimetric detection                  | PBA-Au NPs + Y5GL     | Heating             | Incubate for 45min | 10 nM   | 5         |

|                        |              |   |                   |              |           |
|------------------------|--------------|---|-------------------|--------------|-----------|
| Colorimetric detection | Au NPs + ABC | / | Incubate for 3min | 5.24 $\mu$ M | 6         |
| Colorimetric detection | ADC- Ag NPs  | / | /                 | 2.16 $\mu$ M | This work |

---

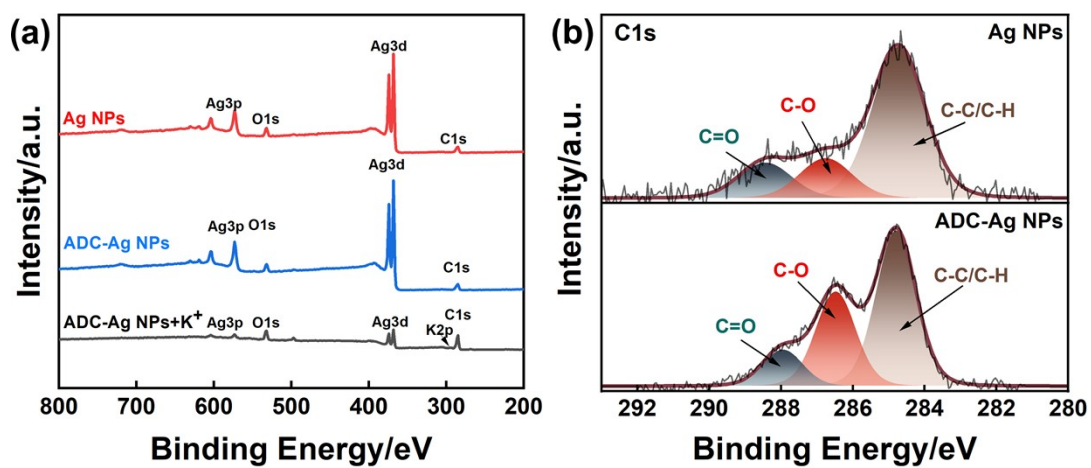

**Figure S1.** XPS spectra of Ag NPs under different conditions. (a) Wide scan XPS spectra of Ag NPs, ADC-Ag NPs and ADC-Ag NPs with K<sup>+</sup> in the range of 200-800 eV and (b) C1s XPS spectra of Ag NPs and ADC-Ag NPs (The concentration of K<sup>+</sup> is 100  $\mu$ M).

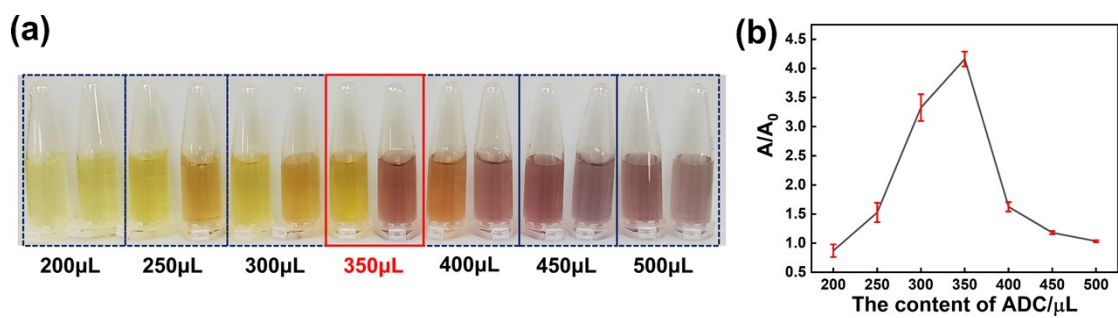

**Figure S2.** Effect of ADC content (200, 250, 300, 350, 400, 450, 500  $\mu\text{L}$ ) on the detection of  $\text{K}^+$  (a)

Colorimetric photograph (In each group, the blank sample is on the left and the experimental group containing  $\text{K}^+$  is on the right); (b) UV-vis absorption intensity ratio  $A/A_0$  of ADC-Ag NPs solutions with different content of ADC ( $A$  represents the absorption intensity ratio of ADC-Ag NPs solution containing  $\text{K}^+$  at 520 nm and 400 nm,  $A_0$  represents the absorption intensity ratio of the blank sample. The concentration of  $\text{K}^+$  is 50  $\mu\text{M}$ ).

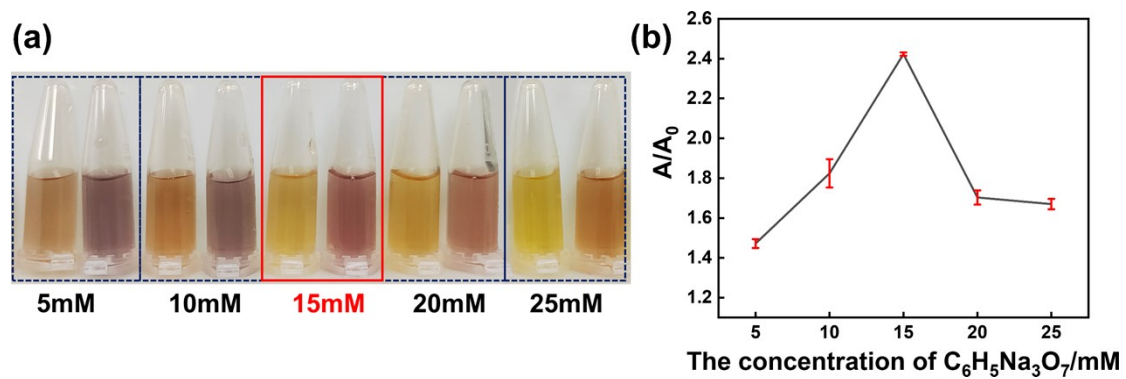

**Figure S3.** Effect of  $C_6H_5Na_3O_7$  concentration (5, 10, 15, 20, 25 mM) on the detection of  $K^+$ . (a)

Colorimetric photograph (In each group, the blank sample is on the left and the experimental group

containing  $K^+$  is on the right); (b) UV-vis absorption intensity ratio of ADC-Ag NPs solutions with

different concentration of  $C_6H_5Na_3O_7$  (The concentration of  $K^+$  is 50  $\mu$ M).

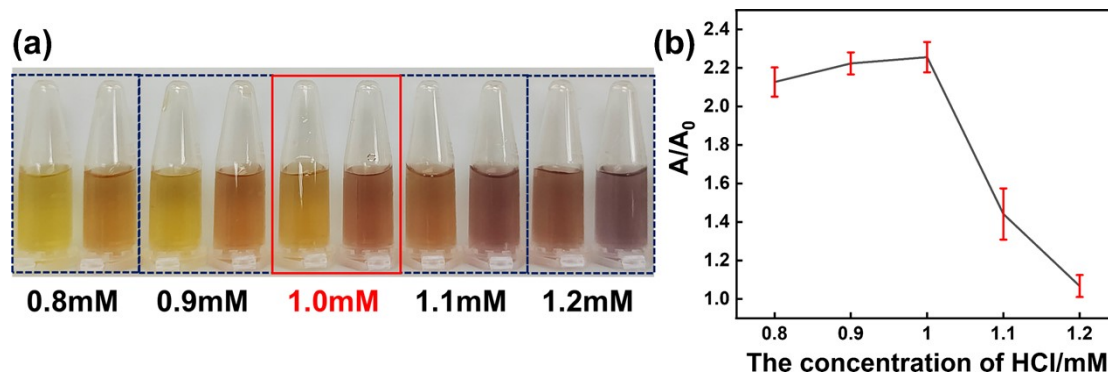

**Figure S4.** Effect of HCl concentration (0.8, 0.9, 1.0, 1.1, 1.2 mM) on the detection effect of K<sup>+</sup>.

(a) Photograph of the colorimetric results (In each group, the blank sample is on the left and the

experimental group containing K<sup>+</sup> is on the right); (b) UV-vis absorption intensity ratio of ADC-Ag

NPs solutions with different concentration of HCl (The concentration of K<sup>+</sup> is 50 μM).



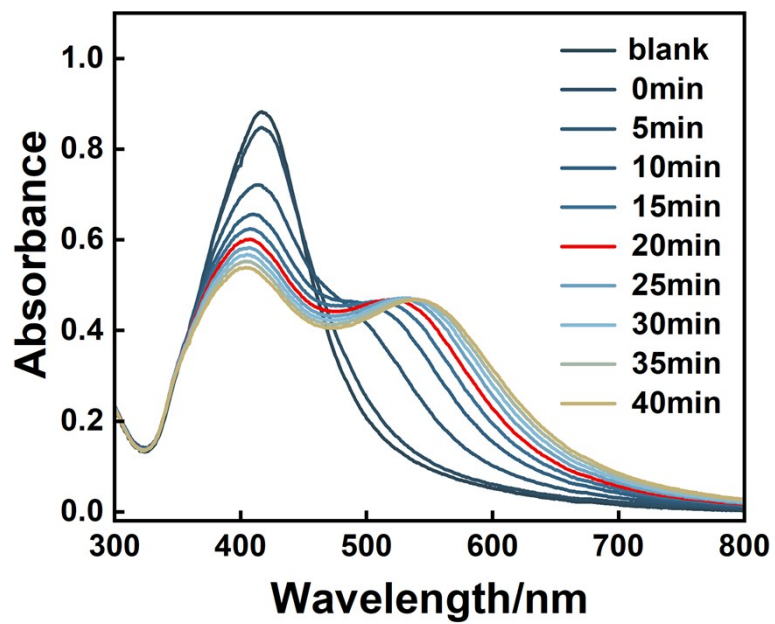

**Figure S5.** Time dependent UV-vis absorption spectra of ADC-Ag NPs solution containing K<sup>+</sup> (0, 5, 10, 15, 20, 25, 30, 35, 40 min. The concentration of K<sup>+</sup> is 50  $\mu$ M).

## References

1. N. K. Dalley, in *Synthetic Multidentate Macrocyclic Compounds*, eds. R. M. Izatt and J. J. Christensen, Academic Press, 1978, pp. 207-243.
2. H. Su, W. Ruan, S. Ye, Y. Liu, H. Sui, Z. Li, X. Sun, C. He and B. Zhao, *Talanta*, 2016, **161**, 743-747.
3. P. Filipczuk, A. Świtalska, J. Kosman, G. Nowaczyk and A. Dembska, *Chemosensors*, 2021, **9**, 349-366.
4. Y. Qian, Y. Li, Y. Qin, D. Jiang and H. Y. Chen, *Analyst*, 2021, **146**, 450-453.
5. M. Naderi, M. Hosseini and M. R. Ganjali, *Spectrochim. Acta. A. Mol. Biomol. Spectrosc.*, 2018, **195**, 75-83.
6. J. Qiu, Y. Zhang, C. Dong, Y. Huang, L. Sun, H. Ruan, H. Wang, X. Li and A. Wu, *Sensors and Actuators B: Chemical*, 2019, **281**, 783-788.
